# Supplementary material for: Tree structures are employed by pigeons as leadership structures to flock
Source: Research Square preprint supplement (doi:10.21203/rs.3.rs-1000239/v1), 2021-10-27
Supplement: Supplementary file 3 [file 694d752b013d23800aa766ad.xlsx]

## Sheet: Sheet1
	A	B1	B2	C1	C2	C3	C4	D1	D2	D3	D4	D5	D6	D7	D8	E1	E2	E3	E4	E5	E6	E7	E8	E9	E10	E11	E12	E13	E14	E15	E16	F1	F2	F3	F4	F5	F6	F7	F8	F9
A	✕	0.92629	0.93719	0.89594	0.889	0.91155	0.90192	0.88788	0.88546	0.89483	0.88204	0.89302	0.87848	0.87691	0.87812	0.8716	0.86569	0.88125	0.8641	0.87224	0.87507	0.84634	0.86633	0.86122	0.86429	0.888	0.88744	0.85137	0.85282	0.85232	0.85044	0.85528	0.84941	0.85809	0.85886	0.85758	0.85232	0.87444	0.87313	0.8469
B1		✕	0.92928	0.90582	0.91212	0.8819	0.88704	0.90376	0.89694	0.88531	0.88256	0.86727	0.86015	0.86871	0.85607	0.88922	0.88748	0.88865	0.8602	0.86814	0.87336	0.83879	0.86765	0.84163	0.83961	0.87774	0.8913	0.83856	0.84157	0.83741	0.83828	0.87126	0.86019	0.8705	0.87028	0.86791	0.86974	0.86405	0.86184	0.84753
B2			✕	0.88729	0.88589	0.91616	0.9178	0.89011	0.88228	0.88154	0.87252	0.89777	0.87405	0.90086	0.88908	0.86381	0.86437	0.8741	0.86572	0.8584	0.86698	0.84213	0.86533	0.86457	0.85409	0.88329	0.88916	0.85826	0.86809	0.85542	0.85643	0.85695	0.84749	0.85284	0.84853	0.8566	0.84852	0.85997	0.86419	0.82969
C1				✕	0.91976	0.87657	0.86939	0.92637	0.92615	0.88181	0.8956	0.86813	0.85054	0.83534	0.84714	0.90324	0.90525	0.90013	0.89747	0.86613	0.87966	0.8506	0.86885	0.83561	0.83676	0.84948	0.86521	0.81893	0.8204	0.82003	0.82654	0.89145	0.88897	0.89152	0.90221	0.87816	0.88387	0.87946	0.8883	0.85413
C2					✕	0.86615	0.87298	0.90342	0.9018	0.9182	0.91433	0.84873	0.83842	0.83812	0.8483	0.88296	0.88109	0.88222	0.87016	0.87754	0.88764	0.8651	0.89111	0.82836	0.82156	0.82726	0.84828	0.82051	0.82731	0.82186	0.82588	0.8622	0.85073	0.87412	0.87638	0.85632	0.86115	0.85557	0.85871	0.86079
C3						✕	0.92988	0.86516	0.86449	0.85548	0.85457	0.9195	0.91646	0.88321	0.89351	0.83846	0.85095	0.85421	0.84332	0.8467	0.84644	0.82479	0.83975	0.87761	0.87616	0.86814	0.88114	0.85702	0.85606	0.84981	0.85997	0.82903	0.82271	0.84849	0.84107	0.83755	0.83374	0.84395	0.84349	0.82454
C4							✕	0.85851	0.86599	0.86366	0.86522	0.89297	0.89189	0.91529	0.91986	0.8397	0.8409	0.84142	0.84804	0.83828	0.84754	0.84195	0.84672	0.86761	0.8661	0.86821	0.87652	0.87243	0.86577	0.86492	0.88369	0.83195	0.82051	0.83882	0.82554	0.82697	0.83368	0.84497	0.8518	0.81623
D1								✕	0.93206	0.87802	0.87573	0.85482	0.8338	0.83479	0.84249	0.91614	0.93454	0.91809	0.90217	0.85133	0.87357	0.82765	0.85456	0.82102	0.82129	0.82939	0.85389	0.81176	0.82293	0.81107	0.81872	0.89525	0.88687	0.89294	0.9112	0.88301	0.8956	0.88295	0.87914	0.84461
D2									✕	0.87496	0.89285	0.85725	0.8393	0.82968	0.83605	0.89814	0.89535	0.92322	0.90978	0.86332	0.88207	0.83949	0.85632	0.82628	0.82331	0.83152	0.85551	0.81072	0.80711	0.81099	0.82511	0.87314	0.87187	0.86778	0.88232	0.89575	0.90394	0.8705	0.88567	0.84693
D3										✕	0.91944	0.84094	0.84032	0.8543	0.84909	0.86535	0.85676	0.86147	0.84822	0.90903	0.91637	0.87615	0.88189	0.82228	0.81598	0.83129	0.8241	0.83337	0.83622	0.82371	0.81332	0.85104	0.83964	0.84343	0.84664	0.83442	0.83748	0.8381	0.84097	0.88047
D4											✕	0.84863	0.84245	0.83588	0.85257	0.84813	0.853	0.86771	0.86009	0.89236	0.89499	0.90029	0.90421	0.8334	0.82754	0.82198	0.83408	0.81712	0.81718	0.81181	0.82736	0.8529	0.84698	0.84235	0.84671	0.84162	0.85041	0.84601	0.84064	0.86966
D5												✕	0.92769	0.86354	0.87564	0.83756	0.84423	0.85101	0.83913	0.83461	0.83617	0.82012	0.84365	0.91314	0.90626	0.88247	0.8969	0.83772	0.8439	0.84642	0.85768	0.82291	0.8188	0.83794	0.83983	0.8366	0.84002	0.82944	0.83121	0.81379
D6													✕	0.8481	0.86296	0.8197	0.82282	0.82408	0.81898	0.82403	0.82488	0.8151	0.823	0.89437	0.89536	0.89802	0.91005	0.82945	0.82259	0.83013	0.83621	0.81235	0.80843	0.81758	0.81875	0.81986	0.82232	0.80988	0.82299	0.81282
D7														✕	0.93114	0.81722	0.81341	0.82705	0.81734	0.82189	0.84521	0.83236	0.84245	0.86188	0.84372	0.84611	0.8487	0.90431	0.89968	0.87161	0.87305	0.81803	0.79605	0.81065	0.80004	0.79397	0.81176	0.82241	0.81922	0.7977
D8															✕	0.81127	0.81716	0.83364	0.83053	0.82533	0.8478	0.83342	0.84325	0.87191	0.85704	0.85207	0.85619	0.90002	0.88711	0.89257	0.90416	0.80492	0.79033	0.81756	0.80902	0.80305	0.82302	0.83369	0.83939	0.81025
E1																✕	0.93438	0.89562	0.87531	0.84226	0.85015	0.81568	0.83068	0.80507	0.80337	0.83608	0.83892	0.79503	0.79575	0.79537	0.79206	0.91511	0.90643	0.90171	0.9065	0.86872	0.86943	0.8515	0.87023	0.85036
E2																	✕	0.89413	0.87274	0.83454	0.83788	0.81644	0.83419	0.81106	0.81417	0.82179	0.83504	0.79785	0.80124	0.80015	0.78871	0.90207	0.89721	0.9295	0.92846	0.8889	0.89069	0.8563	0.88593	0.84028
E3																		✕	0.91812	0.85182	0.86822	0.84184	0.85715	0.81771	0.82248	0.81847	0.8489	0.79764	0.81022	0.81063	0.80976	0.87292	0.8636	0.85045	0.88095	0.90735	0.90706	0.87224	0.87943	0.83638
E4																			✕	0.8398	0.85053	0.82812	0.84047	0.81248	0.8213	0.81191	0.83305	0.78964	0.79198	0.79853	0.80436	0.8621	0.85163	0.84206	0.85563	0.878	0.87144	0.91318	0.90996	0.82509
E5																				✕	0.90032	0.87148	0.86616	0.8128	0.81023	0.82256	0.82151	0.80307	0.81353	0.79491	0.79476	0.82601	0.82237	0.82444	0.83432	0.8335	0.81928	0.8213	0.83108	0.89811
E6																					✕	0.8614	0.88565	0.81569	0.80586	0.82249	0.82502	0.81066	0.82115	0.81057	0.80965	0.83741	0.8266	0.823	0.83385	0.83045	0.83381	0.83693	0.8281	0.86179
E7																						✕	0.9306	0.80043	0.79722	0.7826	0.80943	0.83042	0.82283	0.79459	0.80445	0.81556	0.80179	0.79475	0.8058	0.80774	0.79951	0.8192	0.80712	0.84671
E8																							✕	0.8105	0.80964	0.80136	0.82794	0.83266	0.82378	0.80487	0.81022	0.82547	0.80928	0.81174	0.82034	0.82628	0.81862	0.83472	0.82461	0.85126
E9																								✕	0.92484	0.88226	0.86448	0.83329	0.85716	0.83343	0.84321	0.8008	0.79456	0.81019	0.81241	0.80962	0.82018	0.80425	0.81739	0.7981
E10																									✕	0.87185	0.86878	0.81991	0.83831	0.81472	0.83229	0.79544	0.79471	0.80541	0.81946	0.80682	0.82448	0.80532	0.82424	0.80114
E11																										✕	0.91971	0.82735	0.83602	0.82266	0.82478	0.81827	0.80939	0.81383	0.80663	0.81842	0.811	0.80121	0.82369	0.82282
E12																											✕	0.82277	0.82523	0.83897	0.83462	0.83484	0.82013	0.82221	0.8133	0.82714	0.84036	0.82523	0.8444	0.80574
E13																												✕	0.93354	0.85826	0.85667	0.78482	0.77235	0.78714	0.78346	0.77739	0.79018	0.79547	0.80503	0.78258
E14																													✕	0.86575	0.86785	0.78698	0.77695	0.78774	0.79211	0.79353	0.79614	0.78689	0.80063	0.79309
E15																														✕	0.92902	0.79738	0.78396	0.80197	0.78342	0.794	0.80947	0.80554	0.80712	0.76749
E16																															✕	0.78786	0.77832	0.78273	0.78245	0.78503	0.79783	0.80203	0.81045	0.7734
F1																																✕	0.92609	0.87532	0.87868	0.86373	0.85245	0.84767	0.86617	0.83623
F2																																	✕	0.87973	0.88309	0.85838	0.8498	0.84688	0.85865	0.82645
F3																																		✕	0.92902	0.87466	0.86739	0.84675	0.84617	0.8298
F4																																			✕	0.88549	0.88063	0.85172	0.85529	0.83314
F5																																				✕	0.90858	0.85539	0.86605	0.82498
F6																																					✕	0.85019	0.85898	0.81189
F7																																						✕	0.91315	0.80596
F8																																							✕	0.81593
F9																																								✕
